# Supplementary material for: Assessing Invasion Intensity of the Yellow Crazy Ant (Anoplolepis gracilipes) Through Foraging Behaviour
Source: Research Square preprint supplement (doi:10.21203/rs.3.rs-8598796/v1), 2026-01-16
Supplement: Supplementary file 1 [file b1b002c44b929fa49d35cedd.xlsx]

## Sheet: Supplementary Table1
date	time	time data	bait 1	bait 2	bait 3	bait 4	bait 5	bait 6	bait 7	bait 8	bait 9	bait 10	bait 11	bait 12	bait 13	bait 14	bait 15	bait 16	bait 17	bait 18
2025-09-23	08:30:00	1	Myrmicaria	Myrmicaria	A. gracilipes	A. gracilipes	A. gracilipes	A. gracilipes	A. gracilipes	A. gracilipes	A. gracilipes	A. gracilipes	A. gracilipes	A. gracilipes	A. gracilipes	A. gracilipes	A. gracilipes	A. gracilipes	A. gracilipes	A. gracilipes
2025-09-23	*8:35	1	Myrmicaria	Myrmicaria	A. gracilipes	A. gracilipes	A. gracilipes	A. gracilipes	A. gracilipes	A. gracilipes	A. gracilipes	A. gracilipes	A. gracilipes	A. gracilipes	A. gracilipes	A. gracilipes	A. gracilipes	A. gracilipes	A. gracilipes	A. gracilipes, Tetramorium
2025-09-23	09:30:00	2	Myrmicaria	Myrmicaria	A. gracilipes	A. gracilipes	A. gracilipes	A. gracilipes	A. gracilipes	A. gracilipes	A. gracilipes	A. gracilipes	A. gracilipes	A. gracilipes	A. gracilipes	A. gracilipes	A. gracilipes	A. gracilipes	A. gracilipes	A. gracilipes
2025-09-23	10:30:00	3	Myrmicaria	Myrmicaria	A. gracilipes	A. gracilipes	A. gracilipes	A. gracilipes	A. gracilipes, Nylanderia sp.1	A. gracilipes, Pheidole	A. gracilipes, Tetramorium	Pheidole	A. gracilipes	Pheidole?, unclear, Paraparatrehina?)	A. gracilipes	A. gracilipes, Cardiocondyla	A. gracilipes,Tetramorium	A. gracilipes	A. gracilipes	A. gracilipes
2025-09-23	11:30:00	4	Myrmicaria	Myrmicaria	A. gracilipes	A. gracilipes	A. gracilipes	A. gracilipes	A. gracilipes	A. gracilipes , Tetramorium	Tetramorium	Pheidole	A. gracilipes	none	A. gracilipes	A. gracilipes, Nylanderia sp.2	A. gracilipes, Nylanderia sp.2, Cardiocondyla	A. gracilipes	A. gracilipes	A. gracilipes
2025-09-23	12:30:00	5	Myrmicaria	Myrmicaria	A. gracilipes	A. gracilipes	Pheidole	A. gracilipes, Pheidole	A. gracilipes	A. gracilipes, Tetramorium	Nylanderia sp.1, Pheidole	A. gracilipes	A. gracilipes	N/A	Cardiocondyla	A. gracilipes, Cardiocondyla	A. gracilipes	A. gracilipes	A. gracilipes	A. gracilipes
2025-09-23	13:30:00	6	Myrmicaria	Myrmicaria	A. gracilipes	A. gracilipes	Nylanderia sp.1	Nylanderia sp.1	Nylanderia sp.1, Pheidole	Nylanderia sp.1	Nylanderia sp.1, Tetramorium	A. gracilipes	A. gracilipes	A. gracilipes	A. gracilipes	A. gracilipes	A. gracilipes	A. gracilipes	A. gracilipes	A. gracilipes
2025-09-22	14:30:00	7	Nylanderia sp.2, Cardiocondyla, Pheidole	A. gracilipes, Nylanderia sp.2	none	A. gracilipes	A. gracilipes	A. gracilipes	A. gracilipes	A. gracilipes, Tetramorium	Pheidole	A. gracilipes	A. gracilipes	A. gracilipes	A. gracilipes	A. gracilipes	A. gracilipes	A. gracilipes	A. gracilipes	A. gracilipes
2025-09-23	14:30:00	7	Myrmicaria, Pheidole	Myrmicaria	Nylanderia sp.1	A. gracilipes	Nylanderia sp.1	Nylanderia sp.1	Nylanderia sp.1	Nylanderia sp.1	Nylanderia sp.1	A. gracilipes, Tetramorium	A. gracilipes	A. gracilipes	A. gracilipes	A. gracilipes	A. gracilipes	A. gracilipes	A. gracilipes	A. gracilipes
2025-09-22	15:00:00	8	Myrmicaria	A. gracilipes, Nylanderia sp.2	A. gracilipes	A. gracilipes	A. gracilipes, Tetramorium	A. gracilipes	A. gracilipes	A.gracilipes	Pheidole	A. gracilipes - queen out	A. gracilipes	A. gracilipes	A. gracilipes	A. gracilipes	A. gracilipes	A. gracilipes	A. gracilipes	A. gracilipes
2025-09-23	15:00:00	8	N/A	N/A	N/A	N/A	N/A	N/A	N/A	N/A	N/A	N/A	N/A	N/A	N/A	N/A	N/A	N/A	N/A	N/A
2025-09-22	15:30:00	9	Myrmicaria	A. gracilipes, Nylanderia sp.2	A. gracilipes	A. gracilipes	A. gracilipes	A. gracilipes	A. gracilipes	A. gracilipes	A. gracilipes	A. gracilipes	A. gracilipes	A. gracilipes	A. gracilipes	A. gracilipes	A. gracilipes	A. gracilipes	A. gracilipes	A. gracilipes
2025-09-23	15:30:00	9	Myrmicaria, Pheidole	Myrmicaria	Nylanderia sp.1	A. gracilipes	Nylanderia sp.1, Pheidole	Nylanderia sp.1, Tetramorium?	Nylanderia sp.1	Nylanderia sp.1	Nylanderia sp.1	A. gracilipes	A. gracilipes	A. gracilipes	A. gracilipes	A. gracilipes	A. gracilipes	A. gracilipes	A. gracilipes	A. gracilipes
2025-09-22	16:30:00	10	Myrmicaria	Myrmicaria, Pheidole(N), Tetramorium, Nylanderia sp.2	A. gracilipes	A. gracilipes	A. gracilipes	A. gracilipes	A. gracilipes	A. gracilipes	A. gracilipes	A. gracilipes	A. gracilipes	A. gracilipes	A. gracilipes	A. gracilipes	A. gracilipes	A. gracilipes	A. gracilipes	A. gracilipes
2025-09-23	16:30:00	10	Myrmicaria	Myrmicaria	Nylanderia sp.1	A. gracilipes	Nylanderia sp.1, Tetramorium	Nylanderia sp.1, Tetramorium?	Nylanderia sp.1	Nylanderia sp.1	Nylanderia sp.1	A. gracilipes	A. gracilipes	A. gracilipes	A. gracilipes	A. gracilipes, Tetramorium	N/A	A. gracilipes	A. gracilipes	A. gracilipes
2025-09-22	17:30:00	11	Myrmicaria	Myrmicaria	A. gracilipes	A. gracilipes	A. gracilipes	A. gracilipes	A. gracilipes	A. gracilipes	A. gracilipes	A. gracilipes - queen out	A. gracilipes	A. gracilipes	A. gracilipes	A. gracilipes	A. gracilipes	A. gracilipes	A. gracilipes	A. gracilipes
2025-09-23	17:30:00	11	Myrmicaria	Myrmicaria	Nylanderia sp.1	A. gracilipes	Nylanderia sp.1	Nylanderia sp.1	Nylanderia sp.1	Nylanderia sp.1	Nylanderia sp.1	A. gracilipes	A. gracilipes	A. gracilipes	A. gracilipes	A. gracilipes	A. gracilipes	A. gracilipes	A. gracilipes	A. gracilipes
2025-09-22	18:30:00	12	Myrmicaria	Myrmicaria	Myrmicaria	A. gracilipes	A. gracilipes	A. gracilipes	A. gracilipes	A. gracilipes	A. gracilipes	A. gracilipes	A. gracilipes	A. gracilipes	A. gracilipes	A. gracilipes	A. gracilipes	A. gracilipes	A. gracilipes	A. gracilipes
2025-09-23	18:30:00	12	Myrmicaria	Myrmicaria	Myrmicaria	A. gracilipes	Nylanderia sp.1	Tetramorium?	Nylanderia sp.1	Nylanderia sp.1	Nylanderia sp.1, Tetramorium	A. gracilipes	A. gracilipes	A. gracilipes	A. gracilipes	A. gracilipes	A. gracilipes	A. gracilipes,Tetramorium	A. gracilipes	A. gracilipes, Tetramorium
2025-09-22	19:30:00	13	Myrmicaria	Myrmicaria	A. gracilipes	A. gracilipes	A. gracilipes	A. gracilipes	A. gracilipes	A. gracilipes	A. gracilipes	A. gracilipes	A. gracilipes	A. gracilipes	A. gracilipes	A. gracilipes	A. gracilipes	A. gracilipes	A. gracilipes	A. gracilipes
2025-09-23	19:30:00	13	N/A	N/A	N/A	N/A	N/A	N/A	N/A	N/A	N/A	N/A	N/A	N/A	N/A	N/A	N/A	N/A	N/A	N/A
	* reapply gel for all 18 bait stations
	highligted yellow = baits deployed on different date													M= Cardiocondyla	Re-check=no photo
